1 **Ancient *Yersinia pestis* genomes from across Western Europe reveal early diversification**  
2 **during the First Pandemic (541–750)**

3

4 Marcel Keller<sup>a,b,1,2</sup>, Maria A. Spyrou<sup>a,1</sup>, Christiana L. Scheib<sup>c,d</sup>, Andreas Kröpelin<sup>a,e</sup>, Brigitte  
5 Haas-Gebhard<sup>f</sup>, Bernd Paffgen<sup>g</sup>, Jochen Haberstroh<sup>h</sup>, Albert Ribera i Lacomba<sup>i</sup>, Claude  
6 Raynaud<sup>j</sup>, Craig Cessford<sup>c</sup>, Peter Stadler<sup>k</sup>, Kathrin Nägele<sup>a</sup>, Gunnar U. Neumann<sup>a</sup>, Jessica S.  
7 Bates<sup>c</sup>, Bernd Trautmann<sup>b</sup>, Sarah Inskip<sup>l</sup>, Joris Peters<sup>b,m</sup>, John E. Robb<sup>c</sup>, Toomas Kivisild<sup>c,n</sup>,  
8 Michael McCormick<sup>o,p</sup>, Kirsten I. Bos<sup>a</sup>, Michaela Harbeck<sup>b,2</sup>, Alexander Herbig<sup>a,2</sup>, Johannes  
9 Krause<sup>a,p,2</sup>

10

11 <sup>a</sup>Department of Archaeogenetics, Max Planck Institute for the Science of Human History,  
12 Kahlaische Straße 10, 07745 Jena, Germany

13 <sup>b</sup>SNSB, State Collection of Anthropology and Palaeoanatomy Munich, Karolinenplatz 2a,  
14 80333 Munich, Germany

15 <sup>c</sup>Department of Archaeology, University of Cambridge, Downing St, Cambridge CB2 3ER,  
16 United Kingdom

17 <sup>d</sup>Institute of Genomics, University of Tartu, Riia 23b, 51010 Tartu, Estonia

18 <sup>e</sup>Friedrich Schiller University Jena, Fürstengraben 1, 07743 Jena, Germany

19 <sup>f</sup>Archaeological Collection of the Bavarian State, Himbselstraße 1, 80538 Munich, Germany

20 <sup>g</sup>Institute for Pre- and Protohistoric Archaeology and Archaeology of the Roman Provinces,  
21 Ludwig Maximilian University Munich, Schellingstraße 12, 80799 Munich, Germany

22 <sup>h</sup>Bavarian State Department of Monuments and Sites, Hofgraben 4, 80539 Munich, Germany

23 <sup>i</sup>Department for Municipal Archaeology, Valencia City Council, Calle Traginers s/n 46014  
24 Valencia, Spain

25 <sup>j</sup>CNRS, UMR5140, Archéologie des Sociétés Méditerranéennes, route de Mende, 34199  
26 Montpellier, France

27 <sup>k</sup>Department of Pre- and Protohistory, University of Vienna, Franz-Klein-Gasse 1, 1190  
28 Vienna, Austria

29 <sup>l</sup>McDonald Institute for Archaeological Research, University of Cambridge, Downing St,  
30 Cambridge CB2 3ER, United Kingdom

31 <sup>m</sup>ArchaeoBioCenter and Department of Veterinary Sciences, Institute of Palaeoanatomy,  
32 Domestication Research and the History of Veterinary Medicine, Ludwig Maximilian  
33 University Munich, Kaulbachstr. 37/III, 80539 Munich, Germany

34 <sup>n</sup>Department of Human Genetics, Katholieke Universiteit Leuven, Leuven, 3000, Belgium

35 <sup>o</sup>Initiative for the Science of the Human Past, Department of History, Harvard University,  
36 Robinson Hall M-03, 35 Quincy Street, Cambridge, MA 02138, USA

37 <sup>p</sup>Max Planck-Harvard Research Center for the Archaeoscience of the Ancient Mediterranean  
38

39 <sup>l</sup>These authors contributed equally to this work.

40

41 <sup>2</sup>To whom correspondence may be addressed:

42 Marcel Keller, [keller@shh.mpg.de](mailto:keller@shh.mpg.de), Department of Archaeogenetics, Max Planck Institute for  
43 the Science of Human History, Kahlaische Straße 10, 07745 Jena, Germany

44 Michaela Harbeck, [harbeck@snsb.de](mailto:harbeck@snsb.de), SNSB, State Collection of Anthropology and  
45 Palaeoanatomy Munich, Karolinenplatz 2a, 80333 Munich, Germany

46 Alexander Herbig, [herbig@shh.mpg.de](mailto:herbig@shh.mpg.de), Department of Archaeogenetics, Max Planck Institute  
47 for the Science of Human History, Kahlaische Straße 10, 07745 Jena, Germany

48 Johannes Krause, [krause@shh.mpg.de](mailto:krause@shh.mpg.de), Department of Archaeogenetics, Max Planck Institute  
49 for the Science of Human History, Kahlaische Straße 10, 07745 Jena, Germany

50

51 Author contributions:

52 M.McC., M.H., A.H. and J.K. designed the study. M.K., M.A.S, C.L.S., K.N., G.U.N. and  
53 J.S.B. performed laboratory work. A.K. developed the new analytical tool. M.K. and M.A.S.  
54 performed data analyses. B.T. and S.I. performed anthropological examination. C.L.S. and T.K.  
55 provided genomic data. B.H.-G., B.P., J.H., A.R.iL., C.R., P.S., J.P., J.E.R., and M.H. identified  
56 and provided access to archaeological material. B.H.-G., B.P., J.H., A.R.iL., C.R., C.C., P.S.  
57 and M.McC. provided archaeological and historical information. M.K., M.A.S, M.McC. and  
58 A.H. wrote the paper with contributions from all authors.

## 59 **Abstract**

60 The first historically documented pandemic caused by *Yersinia pestis* started as the Justinianic  
61 Plague in 541 within the Roman Empire and continued as the so-called First Pandemic until  
62 750. Although palaeogenomic studies have previously identified the causative agent as *Y.*  
63 *pestis*, little is known about the bacterium's spread, diversity and genetic history over the course  
64 of the pandemic.

65 To elucidate the microevolution of the bacterium during this time period, we screened human  
66 remains from 20 sites in Austria, Britain, Germany, France and Spain for *Y. pestis* DNA and  
67 reconstructed six new genomes. We present a novel methodological approach assessing SNPs  
68 in ancient bacterial genomes, facilitating qualitative analyses of low coverage genomes from a  
69 metagenomic background. Phylogenetic analysis reveals the existence of previously  
70 undocumented *Y. pestis* diversity during the 6<sup>th</sup>–7<sup>th</sup> centuries, and provides evidence for the  
71 presence of multiple distinct *Y. pestis* strains in Europe. We offer genetic evidence for the  
72 presence of the Justinianic Plague in the British Isles, previously only hypothesized from  
73 ambiguous documentary accounts, as well as southern France and Spain, and that southern  
74 Germany seems to have been affected by at least two distinct *Y. pestis* strains. Four of the  
75 reported strains form a polytomy similar to others seen across the *Y. pestis* phylogeny,  
76 associated with the Second and Third Pandemics. We identified a deletion of a 45 kb genomic  
77 region in the most recent First Pandemic strain affecting two virulence factors, intriguingly  
78 overlapping with a deletion found in 17<sup>th</sup>–18<sup>th</sup>-century genomes of the Second Pandemic.

79

## 80 **Significance Statement**

81 The first historically reported pandemic attributed to *Yersinia pestis* started with the Justinianic  
82 Plague (541–544) and continued for around 200 years as the so-called First Pandemic. To date,  
83 only one *Y. pestis* strain from this pandemic has been reconstructed using ancient DNA. In this  
84 study, we present six new genomes from Britain, France, Germany and Spain, demonstrating  
85 the geographic range of plague during the First pandemic and showing microdiversity in the  
86 Early Medieval Period. Moreover, we detect similar genome decay during the First and Second  
87 Pandemic (17<sup>th</sup> to 18<sup>th</sup> century) that includes the same two virulence factors, thus providing an  
88 example of potential convergent evolution of *Y. pestis* during large scale epidemics.

89

## 90 **Keywords**

91 Justinianic Plague, Ancient DNA, Bacterial evolution, Anglo-Saxons, Merovingians,  
92 Visigoths, multiple burials

## 93 **Introduction**

94 *Yersinia pestis*, the causative agent of plague, is a Gram-negative bacterium that predominantly  
95 infects rodents and is transmitted by their ectoparasites such as fleas. As a zoonosis, it is also  
96 able to infect humans with a mortality rate of 50–100 % without antibiotic treatment (1),  
97 manifesting as bubonic, septicaemic or bubonic plague. After the pathogen spread worldwide  
98 at the end of the 19<sup>th</sup> century in the so-called Third Pandemic that started in 1855 in Yunnan,  
99 China, it established new local foci in Africa and the Americas in addition to the ancient foci  
100 that exist in Central and East Asia. Today, *Y. pestis* causes sporadic infections every year and  
101 even local recurrent epidemics such as documented in 2017 in Madagascar (2).

102 Although recent palaeogenetic analyses have been able to reconstruct an ancient form of *Y.*  
103 *pestis* that infected humans as early as in prehistoric times (2,800 to 1,700 BCE (3–5)) the First  
104 Pandemic (541–750) is the earliest historically recorded pandemic that has been clearly  
105 attributed to *Y. pestis* (6, 7), starting with the fulminant Justinianic Plague (541–544). It was  
106 later followed by the Second Pandemic, which started with the Black Death of 1347–1353 (8,  
107 9) and persisted in Europe until the 18<sup>th</sup> century (10–12).

108 First attempts in the 2000s aimed to amplify *Y. pestis*-specific DNA fragments from burials of  
109 the 6<sup>th</sup> century (13–15). Although some early studies are controversial due to methodological  
110 limitations (16) and proved inconsistent with later work (17), more recent studies have been  
111 successful in reconstructing and authenticating whole *Y. pestis* genomes from two early  
112 medieval burial sites in modern-day Bavaria, Germany (6, 7).

113 These genomic investigations identified a previously unknown lineage associated with the First  
114 Pandemic that was found to be genetically identical in both sites and falls within the modern  
115 diversity of *Y. pestis*. Moreover, this lineage is distinct from those associated with the Second  
116 Pandemic that started ca. 800 years later, indicating two independent emergence events.

117 Although these studies have unequivocally demonstrated the involvement of *Y. pestis* in the  
118 First Pandemic, the published genomes represent a single outbreak, leaving the genetic diversity  
119 of that time entirely unexplored. Here, we assess the diversity and microevolution of *Y. pestis*  
120 during that time by analysing multiple and mass burials in a broader temporal and spatial scope  
121 than previously attempted. After screening 167 samples from 20 archaeological sites, we were  
122 able to reconstruct six new genomes with higher than 5-fold mean coverage from Britain,  
123 France, Germany and Spain. Furthermore, we identified a large deletion in the most recent First  
124 Pandemic strain that affects the same region as a deletion observed in late Second Pandemic  
125 strains, suggesting similar mechanism of pathogen adaptation in the waning period of the two  
126 separate pandemics.

## 127 **Results**

### 128 Screening and Capture

129 We used a previously described quantitative PCR assay (18) that targets the *Y. pestis*-specific  
130 *pla* gene on the pPCP1 plasmid to test 145 teeth from a minimum of 96 individuals from 19  
131 sites (Table S1). All 19 PCR-positive extracts were subsequently turned into double-stranded  
132 libraries and enriched for *Y. pestis* DNA following an in-solution capture approach (19).  
133 Whereas some samples reached up to 9.6-fold chromosomal mean coverage after whole  
134 genome capture, four of the PCR-positive samples yielded a coverage of lower than 0.1-fold.  
135 Since the qPCR assay can amplify non-specific products and subsequent capture can enrich for  
136 environmental DNA that sporadically maps to the *Y. pestis* reference, it is crucial to differentiate  
137 between samples that show low DNA preservation and those that are false positives.

138 False positive samples are unlikely to show similar mapping success on all genetic elements  
139 when compared to true positive samples. Therefore, mapping to all three plasmids was used in  
140 combination with a statistical outlier detection for verification of low coverage genomes. Ratios  
141 of reads mapping to the *Y. pestis* chromosome and the three individual plasmids were  
142 determined, and samples were authenticated by calculating the Mahalanobis distance to detect  
143 outliers ( $\chi^2=9.210$ ,  $df=2$ ,  $p=0.01$ ; Table S2). Two samples, DIR002.A and PEI001.A, were  
144 classified as outliers: despite having chromosomal coverage, they had no or only a few reads  
145 mapping to the plasmids and were therefore considered as *Y. pestis* negative. The remaining 17  
146 samples come from four sites in Germany (Dittenheim [DIT],  $n=3$ ; Petting,  $n=3$ ; Waging  
147 [WAG],  $n=1$ ; Unterthürheim [UNT],  $n=5$ ), one in Spain (Valencia [VAL],  $n=1$ ) and one in  
148 France (Lunel-Viel [LVC],  $n=6$ ) (Table 1, Fig. 1).

149 After mapping to the chromosome, seven genomes showed a higher than 5-fold mean coverage  
150 and were used for downstream analyses. These were DIT003.B (9.4-fold), VAL001.B (9.6-  
151 fold), PET004.A (5.6-fold) as well as UNT003.A and UNT004.A (7.6-fold and 5.2-fold  
152 respectively) (Table S3). Six positive samples of the individuals LVC001, LVC005 and  
153 LVC006 were merged to yield a mean coverage of 6.7-fold for the site of Lunel-Viel. For the  
154 phylogenetic analysis, we omitted the lower-covered UNT004.A after assuring that there are  
155 no conflicting positions with UNT003.A that derives from the same archaeological site.

156 For the 22 samples from Edix Hill, Britain, only shotgun sequencing data was available and,  
157 therefore, pathogen DNA screening was performed using the metagenomic tool MALT (19).  
158 This analysis revealed six putatively *Y. pestis*-positive samples after visual inspection of aligned  
159 reads in MEGAN (20) (Table S4). The sample EDI001.A had more than 9000 reads assigned

160 to *Y. pestis* and was sequenced to a greater depth without enrichment to yield a mean  
161 chromosomal coverage of 9.1-fold.

162

### 163 SNP Evaluation

164 In the context of ancient pathogen DNA, there are three possible sources for false positive  
165 SNPs: First, DNA damage such as deamination of cytosine to uracil can lead to  
166 misincorporation of nucleotides during sample processing (21). Second, the mapping of closely  
167 related environmental species to the reference sequence of the target organism is likely,  
168 especially for conserved regions of the genome (22). Third, mapping of short reads is more  
169 prone to mismapping and calling of false positive SNPs generated at sites of genome  
170 rearrangement. Whereas the first source can be circumvented via *in vitro* protocols like UDG  
171 treatment (23), the latter two can be reduced but not eliminated with strict mapping parameters  
172 and exclusion of problematic regions (24) as applied here. A fourth source for false SNP  
173 assignments could result from multiple genetically distinct strains that would lead to a chimeric  
174 sequence. The later was not observed in our data (Fig. S1) and this phenomenon might be  
175 limited to chronic infections with pathogens such as *Mycobacterium tuberculosis*, where mixed  
176 infections have been previously documented (25).

177 The retrieval of genomes that span a wide geographic area gives us the opportunity to assess *Y.*  
178 *pestis* microdiversity present in Europe during the First Pandemic. Given that our genomes are  
179 of relatively low genomic coverage, we critically evaluated uniquely called and shared SNPs  
180 among the First Pandemic genomes in order to accurately determine their phylogenetic position.  
181 This analysis was performed for all genomes retrieved from UDG-treated libraries with higher  
182 than 5-fold mean coverage, including the previously published high-quality Altenerding  
183 genome (17.2-fold mean coverage).

184 For this, we developed the tool ‘SNPEvaluation’ and defined three different criteria, all  
185 applying for a 50 bp window surrounding the SNP: (A) Comparing the mean coverage after  
186 BWA mapping with high and low stringency and excluding all SNPs that showed a higher  
187 coverage under low stringent mapping than in high stringent mapping. In metagenomic  
188 datasets, reads of related species map frequently to conserved regions in the reference genome.  
189 When the position is not covered by reads from the target organism (*Y. pestis*) but the genomic  
190 region is similar enough in other environmental organisms so that their reads can map, they  
191 might mimic a SNP in *Y. pestis* when the contaminant species carries a different allele in that  
192 position. (B) Excluding all SNPs for which heterozygous calls were identified in the  
193 surrounding regions. Heterozygous calls accumulate in conserved regions due to the above-

194 described effect. (C) Excluding all SNPs within regions that include positions that lack genomic  
195 coverage. Variants in genome architecture often appear as gaps in mapped data and are likely  
196 to cause mapping errors, potentially resulting in false positive SNPs.

197 This evaluation was applied to all SNPs identified as unique to the First Pandemic lineage,  
198 totalling between one and 15 per genome, respectively (Table S5). 17 authentic derived  
199 chromosomal SNPs and an additional one detected on the pMT1 plasmid were found across all  
200 seven genomes (Table S6). The Altenerding genome (AE1175) as well as the genomes of  
201 Unterthürheim (UNT003.A, UNT004.A) and Dittenheim (DIT003.B) appear identical after  
202 SNP evaluation at all positions, with the exception of one SNP which is covered in both UNT  
203 samples, and by only one read in DIT003.B, but not covered in Altenerding. The genomes from  
204 Petting (PET004.A), Valencia (VAL001.B) and Lunel-Viel (LVC00\_merged) appear distinct,  
205 each occupying a unique branch comprised of two, three and ten unique SNPs, respectively  
206 (Fig. 2B and Table S6). One additional SNP was found on the pMT1 plasmid in the Valencia  
207 genome (VAL001.B). An analysis of the Aschheim genome as well as a SNP effect analysis is  
208 presented in the SI.

209 Since the Altenerding genome shows the highest coverage (6), all SNPs previously presented  
210 as unique SNPs for this genome were evaluated as potentially shared SNPs when they appeared  
211 in at least one of the new genomes – excluding the position shared exclusively with DIT003.B  
212 and UNT004.A. We applied the exact same parameters as for the unique SNPs, but also  
213 considered positions with less than 3-fold coverage (Table S7). Only SNPs that pass all three  
214 criteria of our SNP evaluation in at least half of the analysed genomes (i.e., four out of seven)  
215 were accepted as true shared SNPs, reducing the number from 53 identified in a previous study  
216 (6) to 43.

217 The Waging sample (WAG001.A) had a genomic coverage too low for inclusion in our  
218 phylogenetic analysis. Since it was the only sample giving evidence for *Y. pestis* presence at  
219 this site, it was assessed for all SNPs that were either shared or unique in the other First  
220 Pandemic genomes. Visual inspection revealed seven of the 43 shared SNPs to be present in  
221 the WAG001.A genome at low coverage (<3-fold), but none of the unique ones. For both shared  
222 and unique SNPs, no conflicting positions were found. This strain could, therefore, be attributed  
223 to the First Pandemic lineage without, however, resolving its exact position (Table S5).

224 The genome reconstructed from the non-UDG library of EDI001.A was not considered in the  
225 presented SNP analysis, since damaged sites interfere with the defined SNP evaluation criteria.  
226 With a mean coverage of 9.1, we accept the two relevant positions (one ancestral and one

227 derived SNP) as true positive after visual inspection. Regardless, metrics determined in the SNP  
228 evaluation are still reported for comparison.

229

### 230 Phylogenetic analysis

231 A set of 233 modern *Y. pestis* genomes (Table S8) as well as seven Second Pandemic genomes,  
232 including a representative of the Black Death strain (London) and six post-Black Death  
233 genomes (16<sup>th</sup>-century Ellwangen (11); 18<sup>th</sup>-century Marseille (12)), and an ancient genome  
234 from Tian Shan (DA101, 2<sup>nd</sup> to 3<sup>rd</sup> century (26)) were used for phylogenetic analyses alongside  
235 our First Pandemic genomes presented here (Table S3) and the previously published genome  
236 of Altenerding. The *Y. pseudotuberculosis* isolate IP32953 (27) was used as an outgroup.

237 Our maximum likelihood tree (28) constructed from the full SNP alignment reveals that all of  
238 the genomes presented here occupy positions on the same lineage (Fig. 2A, Fig. S2). This  
239 confirms their authenticity and is congruent with previous association of this lineage to the First  
240 Pandemic (541–750). In addition, the previously reported genome from Altenerding (2148) is  
241 identical to the new genomes from Dittenheim (DIT003.B) and Unterthürheim (UNT003.A).  
242 Moreover, the genomes of Petting (PET004.A), Valencia (VAL001.B) and Lunel-Viel  
243 (LVC\_merged) seem to diverge from the Altenerding cluster through a polytomy (Fig. 2C,  
244 bootstrap support 98 %). The British genome of EDI001, however, branches off one SNP  
245 ancestral to this polytomy (bootstrap support 100 %) and possesses one unique SNP. This is  
246 remarkable, since the British Isles are one of the most remote places where the First Pandemic  
247 has been suspected to have reached in relation to the presumed starting point in Egypt.

248

### 249 Virulence factor and deletion analysis

250 We screened for the presence/absence of 80 chromosomal and 42 plasmid associated virulence  
251 genes (29, 30) in all First Pandemic genomes with higher than 5-fold coverage (Fig. 3 and Fig.  
252 S3). Only the filamentous prophage was consistently found absent in all presented genomes.  
253 This is expected, since it has integrated into the genome of only a number of modern Branch 1  
254 genomes (31). Reduced coverages for a set of virulence factors can be seen in the Altenerding  
255 (AE1175) and Ellwangen genomes due to a capture bias, since the capture probe set in the  
256 respective studies was designed on the basis of *Y. pseudotuberculosis* rather than of *Y. pestis*  
257 (6, 11).

258 Intriguingly, the most derived First Pandemic genome from Lunel-Viel shows a deletion of two  
259 chromosomal virulence factors, *mgtB* and *mgtC* (Fig. 3). These magnesium transporters are part  
260 of the PhoPQ regulon, which is important for survival of *Y. pestis* in the magnesium-deficient



261 environment of macrophages. However, functional studies on *mgtB* hint at an important role  
262 during macrophage invasion rather than intracellular survival (32).

263 A second deletion was observed for the gene YPO2258, categorized as a potential virulence  
264 factor based on the presence of a frame shift mutation in the avirulent 0.PE2\_Microtus91001  
265 strain (30). Its inactivation in the 2.ANT1\_Nepal516 strain, isolated from a human patient,  
266 nevertheless indicates that this gene is not essential for virulence in humans (33).

267 Further exploration of the deletion of the two neighbouring genes *mgtB* and *mgtC* revealed that  
268 they are part of a ca. 45 kb deletion (positions 1,883,402 to 1,928,869 in the CO92 reference),  
269 affecting 34 genes including multiple motility (*motA*, *motB*) and chemotaxis genes (*cheA*, *cheB*,  
270 *cheD*, *cheR*, *cheW*, *cheY*, *cheZ*) (Fig. S4). On the downstream end, the deletion is flanked by an  
271 IS100 insertion element. A potential upstream insertion element might be undetectable at our  
272 current resolution due to a genome rearrangement in the reference genome CO92. This is in  
273 agreement with previous findings concerning the highly abundant IS100 element in *Y. pestis*,  
274 responsible not only for disruptions of multiple genes caused by homologous recombination  
275 (27), but also for the loss of the 102 kb long *pgm* locus containing a high-pathogenicity island  
276 in several strains (34). To address the specificity of this deletion to the 6<sup>th</sup>–7<sup>th</sup> century strain  
277 from France, we also investigated the presence of the two virulence factors in all other modern  
278 and ancient strains in this study. Intriguingly, a similar deletion affecting the same region  
279 including *mgtB* and *mgtC* was observed in the late Second Pandemic genomes from London  
280 New Churchyard, (1560-1635 (35)) and Marseille L'Observance (1720-1722 (12)). However,  
281 a full deletion of this 45 kb region was not found in any of the other ancient or modern genomes.  
282 Therefore, the deletion appeared independently in the course of both the First and Second  
283 Pandemics.

284

## 285 **Discussion**

### 286 Identifying *Y. pestis* DNA in low complexity specimens

287 In total, we screened 145 samples from 19 sites in France, Germany and Spain for *Y. pestis* with  
288 a qPCR assay (18) and 22 additional samples from Edix Hill, Britain, with the metagenomic  
289 tool MALT (19). While the most promising sample of Edix Hill was directly sequenced to  
290 greater depth to reach a chromosomal mean coverage of 9.1-fold, all qPCR positive samples of  
291 the other sites were turned into UDG libraries and subsequently enriched for *Y. pestis*, resulting  
292 in mean coverages ranging from 0.01 to 9.6-fold.

293 The validation of ancient genomes with relatively low coverage as presented here is challenging  
294 since the DNA extracted from archaeological remains results in metagenomic data and the  
295 differentiation between target organism DNA and environmental background can be difficult.  
296 The identification of *Y. pestis* DNA based on PCR targeting the *pla* locus on the pPCP1 plasmid  
297 has theoretically been shown to be problematic (36), leading to discussions about false positive  
298 results (16). However, assignment to *Y. pestis* based on reads retrieved from shotgun  
299 sequencing and mapping to a reference genome also can be challenging in case of extremely  
300 low genomic coverage (3, 4). Since all the presented genomes, except the one from Edix Hill,  
301 are derived from DNA libraries specifically enriched for *Y. pestis* DNA and are thus biased  
302 towards the target organism, a previously suggested competitive mapping approach (3) would  
303 not be suitable. Instead, we considered the relative number of mapping reads to the plasmids  
304 and chromosome to identify false positive samples from captured data. We were able to verify  
305 that 17 out of 19 samples were positive for *Y. pestis* with as few as 4000 reads mapping to the  
306 chromosome. Since the three plasmids pCD1, pMT1 and pPCP1 were already present in the  
307 early divergent Neolithic and Bronze Age strains (3, 4) and loss of plasmids has only been  
308 observed sporadically in attenuated strains (37), this method could be reliably applied to data  
309 stemming from other branches in the *Y. pestis* phylogeny.

310

### 311 Analysing microdiversity with low coverage genomes

312 Reliable SNP calling is crucial for the phylogenetic analysis of verified low coverage genomes  
313 and can be challenging when dealing with ancient pathogen DNA stemming from metagenomic  
314 contexts. This has been demonstrated on *Y. pestis* genomes (6), but previously applied visual  
315 inspections are time-consuming and not easily reproducible.

316 Here, we present a novel approach for SNP authentication using a semi-automated SNP  
317 evaluation. We selected three criteria for our evaluation to assess the likelihood of mismapping.  
318 We excluded all SNPs that (A) had higher coverage when mapped with less strict parameters,  
319 (B) had ‘heterozygous’ positions in close proximity or (C) were flanked by gaps. With these  
320 filters, we tolerate a loss of sensitivity to increase specificity, which is critical for detection and  
321 characterization of microdiversity. Moreover, the tool ‘SNPEvaluation’ that was newly  
322 developed for this analysis offers a highly flexible framework for the assessment of VCF files  
323 and can be utilized also for a variety of analyses on different organisms.

324

325

326

## 327 Phylogenetic analysis

328 We were able to confidently reconstruct six new genomes from the First Pandemic in Britain,  
329 France, Germany and Spain, providing insights into the microdiversity of *Y. pestis* in Europe  
330 between the 6<sup>th</sup> and 7<sup>th</sup> centuries.

331 Our presented genomes add diversity to a phylogenetic lineage that was previously shown to  
332 contain two identical 6<sup>th</sup> century genomes of southern Germany (Aschheim and Altenerding (6,  
333 7)). It diverges between the 0.ANT1, 0.ANT2 and 0.ANT5 clades in the main *Y. pestis*  
334 phylogeny and shares a short branch with a 2<sup>nd</sup>- to 3<sup>rd</sup>-century genome from the Tian Shan  
335 mountains (26). Intriguingly, a single diversification event gave rise to the published as well as  
336 three of the presented additional genomes, each defined by 1 to 10 derived SNPs. Similar  
337 polytomies can be detected in other parts of the phylogeny of *Y. pestis* that have been related to  
338 human epidemics (38): one gave rise to Branches 1 to 4 (including ancient Second Pandemic  
339 genomes, Fig. 2A) and is dated to 1142-1339 (38), shortly before the European Black Death.  
340 To date it is unknown if this event was restricted to a rodent reservoir, or if it was already  
341 associated with a human epidemic. A second polytomy gave rise to the 1.ORI clade, which  
342 includes strains related to the worldwide spread of plague during the Third Pandemic in the 19<sup>th</sup>  
343 century (Fig. 2C).

344 Within the First Pandemic lineage, the genomes that derive from this polytomy display variable  
345 terminal branch lengths (1-10 SNPs), which are likely concurrent with their different ages (see  
346 below). Given that *Y. pestis* is a pathogen that can cover large geographic distances by  
347 accumulating little to no genetic diversity (11), it is challenging to elucidate the geographic  
348 origin for this diversification event. A first hypothesis suggests an origin of this diversification  
349 event within the historically recorded geographic range of the First Pandemic, i.e. either in  
350 Europe, the Mediterranean basin, or the Middle East. Our current data may lend some  
351 credibility to this scenario for two reasons: First, we identify four European strains with short  
352 genetic distances from this polytomy, the shortest of which is identified in three locations in  
353 rural Bavaria, and second, we identify an almost direct ancestor of this polytomy to be present  
354 in Europe during the 6<sup>th</sup> century, represented by a genome from Britain. Alternatively, the  
355 bacterium may have been recurrently introduced to the affected regions from a single remote  
356 reservoir.

357 The hypothesis of a single introduction would require the establishment of a local reservoir,  
358 since we have to assume that at least the genome recovered from Lunel-Viel is not directly  
359 associated with the initial outbreak in 541–544 but rather with a subsequent one (see below).  
360 Possible locations for reservoirs during the First Pandemic have been suggested in the Iberian

361 peninsula and the Levant (39). There is also a growing body of evidence for the presence of  
362 black rats (*Rattus rattus*) in Europe in late Antiquity and the Early Medieval Period (40, 41),  
363 suspected to represent the main reservoir species during the Second Pandemic (40).

364 Such a scenario would be congruent with the Second Pandemic, where the phylogeny of ancient  
365 genomes is in line with a single introduction and subsequent persistence in a local host (11, 35,  
366 42), although this hypothesis was challenged by an alternative scenario claiming multiple  
367 introductions on the basis of climatic data (43). Similar to the European Second Pandemic  
368 lineage (11, 12), strains emerging from the First Pandemic lineage have so far been recovered  
369 solely from ancient DNA of European plague burials, suggesting that the lineage either went  
370 extinct or persists in a yet unsampled reservoir.

371

### 372 Origin of the Justinianic Plague

373 Based on available data, it has been suggested that the most parsimonious location for the  
374 divergence event that gave rise to the First Pandemic lineage is Central Asia (26). All published  
375 genomes of the branches 0.ANT1, 0.ANT2 and 0.ANT5 that frame the First Pandemic lineage  
376 in the phylogenetic tree were sampled in the autonomous Xingjiang region in north-western  
377 China or in Kyrgyzstan (38, 44). In addition, an ancient 2<sup>nd</sup>- to 3<sup>rd</sup>-century *Y. pestis* genome  
378 from the Tian Shan mountains in Central Asia (26) branches off basal to all the First Pandemic  
379 genomes. The resulting claim that the Huns might have brought plague to Europe is however  
380 unsubstantiated due to the gap of more than three centuries prior to the onset of the First  
381 Pandemic.

382 Since the long shared branch of the First Pandemic genomes (43 SNPs) does not have any  
383 known extant descendants, this strain might have been maintained in a now extinct reservoir  
384 after its emergence in Central Asia. The first outbreak is reported in Pelusium, Egypt; an  
385 introduction from either Africa or Asia was presumed, given the sudden and dramatic onset of  
386 the pandemic. Previous assumptions of an African origin were mainly based on a single deeply  
387 diverging 0.PE strain ‘Angola’ (45) and the reports of the Byzantine historian Evagrius  
388 Scholasticus, who wrote in his *Ecclesiastical History* that the plague began in “Ethiopia”.  
389 However, there are legitimate doubts about the characterization of the ‘Angola’ genome as a  
390 genuine African strain (24, 46) and the account of Evagrius has been assessed critically with  
391 historical and philological methods (47, 48). For an Asian origin, the sea route via the Red Sea  
392 and the Indian Ocean is a plausible scenario since India was well connected by marine traffic  
393 with the early Byzantine Empire (39). A suggested alternative scenario would require overland  
394 transport from the Eurasian Steppe via Iran to the Red Sea that is, so far, not supported by any

395 data (49). In conclusion, we interpret the current data as insufficient to resolve the origin of the  
396 Justinianic Plague as a human epidemic.

397

### 398 Archaeological and historical context

399 Here, we present the first genomic evidence for the First Pandemic reaching the British Isles in  
400 the 6<sup>th</sup> century. This genome was recovered from a burial on the site of Edix Hill, close to  
401 Cambridge (Roman *Duroliponte*) and near a Roman road running north from London  
402 (*Londinium*) toward Lincoln (*Lindum Colonia*) via Braughing, all of which were Roman  
403 settlements. Based on archaeological dating in combination with its rather basal position within  
404 the clade, this genome is likely related to the very first occurrence of plague in Britain suggested  
405 for 544 (see SI). The close proximity to the trade center of ancient London supports that the  
406 strain was introduced by sea communications, e.g., with Brittany, following the outbreak in  
407 central Gaul in 543 (Fig. 1, (50)). Interestingly, the genome was recovered from a single burial,  
408 underlining that in small settlements, plague-induced mortality crises need not always involve  
409 a radical change in mortuary practice towards multiple or mass burials. The fact that three of  
410 the five additional Edix Hill individuals that appeared positive for plague in the MALT  
411 screening were buried in two simultaneous double burials nevertheless suggests that multiple  
412 burials in normal cemeteries are indeed a good indicator for epidemic events (17).

413 In addition, we were able to reconstruct two genomes from the Mediterranean basin, where the  
414 historical records are more explicit about the presence of plague during the First Pandemic.  
415 Regarding Spain, the radiocarbon dating of the *Y. pestis*-positive individual from Valencia  
416 (432-610) would include the first outbreak reported for Spain in 543 in a contemporary  
417 chronicle (see SI). The three unique SNPs identified in this genome, which separate it from the  
418 identified polytomy may suggest its association with a later outbreak. Intriguingly, a canon of  
419 a church council held in 546 in Valencia dealing with burial practices for bishops in case of  
420 sudden death was recently connected with plague by philological and contextual analysis (51).  
421 Later outbreaks within the relevant timeframe are documented in Spain's Visigothic kingdom,  
422 e.g., in 584 and 588 by Gregory of Tours, and by a funerary inscription dated 609 at Cortijo de  
423 Chinales 35 km northeast of Malaga (31).

424 The second Mediterranean genome from Lunel-Viel in southern France likely represents  
425 another outbreak, since it forms an independent strain which derives from the same polytomy  
426 as the Spanish and German genomes. The radiocarbon dates for the inhumations give an interval  
427 of at least 567-618 (youngest lower and oldest upper boundary, Table S9) overlapping with  
428 documented outbreaks in 571, 582, 588, 590 and possibly 599–600 in southern France (see

429 Fig.1A and C). Lunel-Viel's broader vicinity includes Arles, the seaport city of Marseille and  
430 the Rhône mouth. Close to important coastal and fluvial shipping routes as well as Roman roads  
431 that facilitated the spread of plague (39), Lunel-Viel could have been affected by all five  
432 recorded epidemics. The initial outbreak, documented for Arles ca. 543, falls outside of some  
433 of the radiocarbon intervals. This is consistent with the phylogenetic analysis that shows a  
434 higher accumulation of SNPs in this genome. Thus the victims at Lunel-Viel can most likely  
435 be attributed to one of the subsequent outbreaks.

436 Moreover, within Bavaria, Germany we detected *Y. pestis* in four sites (Dittenheim, Petting,  
437 Unterthürheim, Waging) in addition to the two previously published sites (Altenerding (6),  
438 Aschheim (7)). Two of the reconstructed genomes were identical to Altenerding and Aschheim,  
439 suggesting that these four can be attributed to the same epidemic event. Some of the radiocarbon  
440 intervals of these sites fall even slightly before the onset of the First Pandemic, suggesting an  
441 association of this outbreak directly with the Justinianic Plague. Regarding the Edix Hill  
442 genome, this would in turn necessitate the accumulation of one (Edix Hill) to two (Altenerding  
443 cluster) SNPs within the onset of the First Pandemic between 541–544.

444 Intriguingly, the genome of Petting, Bavaria falls not with the Altenerding cluster but in a  
445 distinct phylogenetic position. Since this strain also branches off from the common node with  
446 the other Bavarian strain as well as the French and Spanish genomes, this shows the presence  
447 of two independent strains and, therefore, presumably two independent epidemic events in early  
448 medieval Bavaria. This is striking, since we lack any historical records of the First Pandemic  
449 affecting southern Germany. The radiocarbon dates for the Bavarian sites are inconclusive and  
450 do not allow for a clear temporal separation of the two events. The higher number of  
451 accumulated SNPs nevertheless suggests a younger date for the epidemic represented by  
452 Petting. Further phylogeographic analyses are presented in the SI.

453

#### 454 Deletion analysis

455 The analysis of virulence factors revealed a deletion of a ca. 45 kb region in the most derived  
456 and putatively most recent genome thus far identified for the First Pandemic. This deletion  
457 contained two previously described virulence factors involved in host cell invasion and  
458 intracellular growth (*mgtB* and *mgtC*). Intriguingly, a similar deletion covering the same  
459 genomic region was detected in the most derived available Second Pandemic genomes from  
460 London New Churchyard (1560-1635) and Marseille (1720-1722). Genome decay by deletion  
461 or pseudogenization is a well-known trait of *Y. pestis* and has contributed to its distinct ecology  
462 and pathogenicity (53). Both deletions from the First and Second Pandemic are observed in

463 genomes recovered from human victims. Therefore, it is reasonable to assume that the deletion  
464 may not have reduced the bacterium's virulence. Moreover, it affects a number of cell surface  
465 proteins – remnants of the motile lifestyle of non-pestis *Yersiniae* (54) – so the deletion might  
466 have even facilitated immune evasion.

467 Because none of the investigated modern strains harboured this specific deletion, this possible  
468 case of convergent evolution might be an adaptation to a distinct ecological niche in Europe or  
469 the Mediterranean basin since an ancient local reservoir is the most parsimonious hypothesis  
470 for both historical pandemics (12, 42).

471

## 472 Concluding remarks

473 Our study succeeds in offering new insights into the first historically documented plague  
474 pandemic, complementing the limited power of conventional historical, archaeological or  
475 palaeoepidemiological research. Moreover, we show the potential of palaeogenomic research  
476 for understanding historical and modern pandemics by a comparative approach on genomic  
477 features throughout millennia. Facing the problem of low coverage genomic data with a high  
478 environmental background – a notorious challenge in ancient DNA research –, we have  
479 developed new approaches to facilitate the authentication and confident phylogenetic  
480 placement of such genomes.

481 In the future, more extensive sampling of putative plague burials will help to draw a more  
482 comprehensive picture of the onset and persistence of the First Pandemic, especially on sites in  
483 the eastern Mediterranean basin, where not only is the Justinianic Plague reported to have  
484 started, but where also the 8<sup>th</sup> century outbreaks also clustered. This will contribute to the  
485 comparative exploration of *Y. pestis*' microevolution and human impact in the course of past  
486 and present pandemics.

487

## 488 **Material and Methods**

### 489 Sites and Samples

490 The acquisition and selection of samples followed two approaches: Focussing on Bavaria, we  
491 concentrated on one region, where the two previously reconstructed *Y. pestis* genomes  
492 attributed to the Justinianic Plague had been found (6, 7). Additionally, given the absence of  
493 robust genetic evidence from the Mediterranean basin, which historical records depict as the  
494 epicenter of the pandemic, and the controversial presence of plague on the British Isles during  
495 the Justinianic Plague, we extended our screening to three sites with multiple burials in a

496 broader geographical scope on the Mediterranean coast in France and Spain and inland Britain.

497 Table 1 gives an overview of all tested sites.

498 For the first focus, we collected samples of 79 individuals from 46 burials belonging to 16  
499 archaeological sites in Bavaria, Germany and one site in Austria (See Fig. 1B). The dating of  
500 the burials spans the 4<sup>th</sup> to 10<sup>th</sup> century, including also burials dating before (8 individuals on 3  
501 sites) and after (17 individuals on 5 sites) the Justinianic Plague (541–544). Since mass graves  
502 that could be indicative of an epidemic are unsurprisingly rare for the small settlements  
503 associated with early medieval cemeteries in Bavaria, we followed the approach of the previous  
504 successful studies (6, 7, 17): we systematically screened multiple burials, i.e., where two or  
505 more individuals were found in a context indicating a simultaneous burial, such as a common  
506 grave pit and articulated remains on the same level. Single burials were sporadically tested, if  
507 the context suggested a close connection to a multiple burial. Burials with indications of a  
508 violent death of the interred were excluded, since a coincidental acute infection with *Y. pestis*  
509 seems unlikely.

510 Within the Mediterranean basin, we tested inhumations from Valencia, Spain and Lunel-Viel  
511 (Hérault), France. A contemporary chronicler records that bubonic infection devastated Spain  
512 during the first phase of the Justinianic Plague (541–544), and new interpretation of a  
513 contemporary record argues that it reached Valencia presumably before 546 (51). Further  
514 textual references, including an epitaph dating to 609, document later Iberian outbreaks (52)  
515 (See Fig. 1). In the Visigothic levels of the *Plaça de l'Almoïna* in Valencia, several collective  
516 burials in an intramural cemetery were interpreted as possible plague burials (52, 55).

517 The historical evidence for the First Pandemic in France is more substantial, mainly based on  
518 the contemporary bishop and historian Gregory of Tours (56). He reports several plague  
519 outbreaks spanning from ca. 543 in the province of Arles through 588 in Marseille to 590 in  
520 Avignon (See Fig. 1C). The site of Lunel-Viel, around 30 km southwest of the ancient Roman  
521 city of Nîmes and less than 100 km from the mentioned cities, revealed eight exceptional  
522 inhumations in demolition trenches unrelated to the nearby contemporary cemeteries (57).

523 For the British Isles, the historical evidence for plague presence in the 6<sup>th</sup> century is  
524 controversial. Unlike later outbreaks in 7<sup>th</sup>-century Britain that are reported, e.g., by Bede, the  
525 identification of a disease occurring in the 540s and called *blefed* in Irish chronicles as bubonic  
526 plague is mainly based on coincidence with the Continental European outbreaks and thus  
527 uncertain. The same is true for Britain, where a great mortality (*mortalitas magna*) is reported  
528 in the *Annales Cambriae* (see SI). For this study, we screened 22 individuals from the Anglo-



529 Saxon cemetery of Edix Hill, well-connected to the Roman road network and Roman towns,  
530 and characterized by a number of multiple burials.

531 For the screening, one tooth (preferentially molar) per individual was used for every individual  
532 of a multiple burial, if available. For a number of individuals, additional teeth were tested, if  
533 sequencing the first gave a weak positive. For the collective burials from Valencia, a clear  
534 attribution to individuals was not assured, so multiple teeth were sampled per feature number,  
535 if possible. Detailed site descriptions can be found in the SI, including a table with all screened  
536 samples (Table S1).

537

### 538 Sample Preparation, DNA Extraction, qPCR and MALT Screening

539 The sample preparation and DNA extraction for samples from Austria, France, Germany and  
540 Spain was done in the ancient DNA facilities of the ArchaeoBioCenter of the University of  
541 Munich, Germany, and the Max Planck Institute for the Science of Human History in Jena,  
542 Germany.

543 All teeth were cut along the cemento-enamel junction and the surface of the pulp chamber was  
544 drilled out with a dental drill from the crown and in some cases the root, aiming for 30 to 50 mg  
545 of bone powder. DNA was extracted based on the protocol published in (58): The powder was  
546 suspended in 1 ml of extraction buffer (0.45 M EDTA pH 8.0, and 0.25 mg/ml Proteinase K in  
547 UV-irradiated HPLC water) and incubated at 37 °C overnight on a rotor. After centrifugation,  
548 the supernatant was mixed with 10 ml binding buffer (5 M guanidinium hydrochlorid, 40 %  
549 isopropanol and 90 mM sodium acetate) to bind the DNA on a silica column of either the  
550 MinElute purification kit (Qiagen) or the High Pure Viral Nucleic Acid Kit (Roche). After  
551 purification with washing buffer of the respective kit, the DNA was eluted in 100 µl TET buffer  
552 (10 mM Tris-HCl, 1 mM EDTA pH 8.0, 0.05 % Tween20).

553 All extracts were tested with the qPCR assay targeting a 52 bp region on the pPCP1 plasmid  
554 published in (18) with minor changes (0.75 mg/ml BSA, additional 5 % DMSO, EVA green  
555 instead of SYBR green, annealing for 30 s, elongation for 30 s, gradient from 60 to 90 °C). All  
556 samples showing an amplification with a melting peak between 74 and 80 °C were captured for  
557 *Y. pestis*.

558 The samples of Edix Hill, UK were prepared in the ancient DNA facility of the University of  
559 Cambridge, Department of Archaeology. Root portions of teeth were removed with a sterile  
560 drill wheel. These root portions were briefly brushed with 5 % w/v NaOCl using a UV-  
561 irradiated toothbrush that was soaked in 5 % w/v NaOCl for at least 1 min between samples.  
562 Roots were then soaked in 6 % w/v bleach for 5 min. Samples were rinsed twice with ddH<sub>2</sub>O

563 and soaked in 70 % Ethanol for 2 min, transferred to a clean paper towel on a rack inside the  
564 glove box, UV irradiated for 50 min on each side, and then allowed to dry. They were weighed  
565 and transferred to clean, UV-irradiated 5 ml or 15 ml tubes for chemical extraction. Per 100 mg  
566 of each sample, 2 ml of EDTA Buffer (0.5 M pH 8.0) and 50 µl of Proteinase K (10 mg/ml)  
567 were added. Tubes were rocked in an incubator for 72 h at room temperature. Extracts were  
568 concentrated to 250 µl using Amplicon Ultra-15 concentrators with a 30 kDa filter. Samples  
569 were purified according to manufacturer's instructions using the Minelute™ PCR Purification  
570 Kit with the only change that samples were incubated with 50 µl Elution Buffer at 37 °C for  
571 10 min prior to elution.

572

### 573 Library Preparation

574 Of putatively positive extracts in the qPCR screening, 50 µl were turned into Illumina double-  
575 stranded DNA libraries with initial USER treatment (New England Biolabs) to remove post-  
576 mortem damage in form of deaminated Cytosines by consecutive incubation with uracil-DNA-  
577 glycosylase (UDG) and endonuclease VIII(23). To enhance the efficiency of subsequent double  
578 indexing, UDG-treated libraries were quantified by qPCR using IS7/IS8 primer and split for a  
579 maximum of  $2 \times 10^{10}$  DNA molecules. Every library was indexed with a unique index  
580 combination in a 10-cycle amplification reaction using *Pfu Turbo Cx Hotstart DNA Polymerase*  
581 (Agilent) (59, 60). The amplification products were purified using the MinElute DNA  
582 purification kit (Qiagen) and eluted in TET (10 mM Tris-HCl, 1 mM EDTA pH 8.0, 0.05 %  
583 Tween20). For the capture, the indexed libraries were amplified to 200-300 ng/µl using  
584 *Herculase II Fusion DNA Polymerase* (Agilent) and purified a second time as described.

585 The non-UDG library preparation for all Edix Hill samples was conducted using a protocol  
586 modified from the manufacturer's instructions included in the NEBNext® Library Preparation  
587 Kit for 454 (E6070S, New England Biolabs, Ipswich, MA) as detailed in (61). DNA was not  
588 fragmented and reactions were scaled to half volume, adaptors were made as described in (59)  
589 and used in a final concentration of 2.5 µM each. DNA was purified on MinElute columns  
590 (Qiagen, Germany). Libraries were amplified using the following PCR set up: 50 µl DNA  
591 library, 1x PCR buffer, 2.5 mM MgCl<sub>2</sub>, 1 mg/ml BSA, 0.2 µM in PE 1.0, 0.2 mM dNTP each,  
592 0.1 U/µl HGS Taq Diamond, and 0.2 µM indexing primer. Cycling conditions were: 5' at  
593 94 °C, followed by 18 cycles of 30 seconds each at 94 °C, 60 °C, and 68 °C, with a final  
594 extension of 7 min at 72 °C. Amplified products were purified using MinElute columns and  
595 eluted in 35 µl EB. Samples were quantified using Quant-iT™ PicoGreen® dsDNA kit (P7589,

596 Invitrogen™ Life Technologies) on the Synergy™ HT Multi-Mode Microplate Reader with  
597 Gen5™ software.

598

### 599 In-Solution Capture

600 For the in-solution capture, a probe set was generated using a fragment size of 52 bp and a tiling  
601 of 1 bp with the following genomes as templates: CO92 chromosome (NC\_003143.1), CO92  
602 plasmid pMT1 (NC\_003134.1), CO92 plasmid pCD1 (NC\_003131.1), KIM 10 chromosome  
603 (NC\_004088.1), Pestoides F chromosome (NC\_009381.1) and *Y. pseudotuberculosis* IP 32953  
604 chromosome (NC\_006155.1). The capture was performed as previously described (62) on 96-  
605 well plates with a maximum of two samples pooled per well and all blanks with unique index  
606 combinations in one well.

607

### 608 Sequencing and Data Processing

609 All captured products were sequenced either on a Illumina NextSeq500 or HiSeq4000 platform  
610 at the Max Planck Institute for the Science of Human History in Jena, Germany. Edix Hill  
611 libraries were sequenced on Illumina NextSeq500 at the University of Cambridge Biochemistry  
612 DNA Sequencing Facility and the FastQ files were processed on the Estonian Biocenter server.  
613 De-multiplexed reads were processed with the EAGER pipeline (63) starting Illumina adapter  
614 removal, sequencing quality filtering (minimum base quality of 20) and length filtering  
615 (minimum length of 30 bp). Sequencing data of paired end and single end sequencing were  
616 concatenated after adapter removal and merging. The same was done for samples from the same  
617 individual (DIT004) and all data from Lunel-Viel (LVC) due to low genomic coverage. The  
618 sequencing results are shown in Table S3.

619 All Edix Hill samples were screened using MALT (19) against a reference set including full  
620 bacterial and viral genomes with 85 % identity, the strong positive sample EDI001.A was then  
621 sequenced deeper to a coverage of 9.1-fold without enrichment.

622 After clipping of 3 bases on each end with fastx\_trimmer of the FASTX toolkit  
623 ([https://github.com/agordon/fastx\\_toolkit](https://github.com/agordon/fastx_toolkit)) to remove the majority of damaged sites for the non-  
624 UDG library of EDI001.A, the sample was processed along the UDG treated libraries. Mapping  
625 against reference genomes of CO92 (chromosome NC\_003143.1, plasmid pMT1  
626 NC\_003134.1, plasmid pCD1 NC\_003131.1, plasmid pPCP1 NC\_003132.1) was done with  
627 BWA using stringent parameters (-n 0.1, -l 32). Reads with low mapping quality were removed  
628 with Samtools (-q 37) and duplicates were removed with MarkDuplicates. For the plasmids, a  
629 merged reference was used, consisting of the CO92 reference of pCD1 (NC\_003131.1), pMT1

630 (NC\_003134.1) and pPCP1 (NC\_003132.1, with base pairs 3,000 to 4,200 masked (18)), to  
631 avoid overestimation of coverage due to homologous regions. For the verification of positive  
632 qPCR results, we normalized the number of reads mapping to each plasmid with reads mapping  
633 to the chromosome and calculated the Mahalanobis distance for each sample to detect outliers.  
634 Based on this, we excluded the samples PEI001.A and DIR002.A as false positives (Table S2).  
635 The raw data of the Aschheim and Altenerding genomes were processed identically, however  
636 considering only the A120 sample for Aschheim (6, 7).

637

### 638 SNP Calling and Evaluation

639 All genomes recovered from UDG-libraries with higher than 5-fold mean coverage including  
640 the Altenerding genome were assessed in the SNP analysis. Additionally, the sample  
641 WAG001.A was evaluated to explore its phylogenetic position, since it was the only positive  
642 sample of the relevant site.

643 The UnifiedGenotyper within the Genome Analysis Toolkit was used for SNP calling and  
644 creating VCF files for all genomes, using ‘EMIT\_ALL\_SITES’ to generate calls for all  
645 positions in the reference genome. For the subsequent analyses, 233 previously published  
646 modern *Y. pestis* genomes (Table S8), one genome from 2<sup>nd</sup> to 3<sup>rd</sup> century Tian-Shan mountains  
647 (DA101 (26)) one genome representing the Black Death from London East Smithfield (8291-  
648 11972-8124 (12)), and six Second Pandemic genomes (Ellwangen, Marseille L’Observance  
649 OBS107, OBS110, OBS116, OBS124, OBS137 (11, 12)) were taken along together with *Y.*  
650 *pseudotuberculosis* (IP32953) as an outgroup. Previously identified problematic regions (24,  
651 38) as well as regions annotated as repeat regions, rRNAs, tRNAs and tmRNAs were excluded  
652 for all following analyses. MultiVCFAnalyzer v0.85 (64) was used for generating a SNP table  
653 with the following settings: Minimal coverage for base call of 3 with a minimum genotyping  
654 quality of 30 for homozygous positions, minimum support of 90 % for calling the dominant  
655 nucleotide in a ‘heterozygous’ position. All positions failing these criteria would be called ‘N’  
656 in the SNP table. For the SNP evaluation, all ‘N’ positions of unique SNPs within the First  
657 Pandemic lineage were re-evaluated, replacing ‘N’ by ‘0’ for not covered and lower case letters  
658 for homozygous positions with max. 2-fold coverage. To test for possible mixed infections of  
659 elevated contamination, all SNPs not passing the 90 % threshold were plotted (Fig. S1).

660 For the evaluation of unique and shared SNPs of First Pandemic genomes retrieved from non-  
661 UDG libraries, we used the newly developed tool ‘SNPEvaluation’  
662 ([https://github.com/andreasKroepelin/SNP\\_Evaluation](https://github.com/andreasKroepelin/SNP_Evaluation)) and a comparative mapping, using  
663 BWA with high stringent (-n 0.1, -l 32) and low stringent (-n 0.01, -l 32) mapping parameters,

664 allowing for more mismatches in the latter. SNPs were called true positive when meeting the  
665 following criteria within a 50 bp window: (A) the ratio of mean coverage of low stringent to  
666 high stringent mapping is not higher than 1, (B) no ‘heterozygous’ positions, (C) no non-  
667 covered positions (Table S5). SNP evaluation on the plasmids was done using the same criteria  
668 after mapping to the individual references as described above. For the SNP effect analysis, the  
669 remaining unique true SNPs were compared to the genome annotations of the CO92 *Y. pestis*  
670 reference genome (Table S6).

671 Shared SNPs (Table S7) were evaluated with the same criteria with minor modifications: The  
672 minimum threshold for calling a position was set to 1 read covering and SNPs were called true  
673 positive, if the SNP passed the criteria in more than half of the genomes under examination.

674 The genome of EDI001.A from Edix Hill was only included in the presented SNP evaluation  
675 for comparison, since it is derived from a non-UDG library and damaged sites interfere with  
676 both the comparative mapping and the count of heterozygous positions.

677 The Aschheim genome was evaluated separately (Table S8) but with the same criteria. As  
678 previously addressed (6), the enormously high number of false positive SNPs might not be  
679 explained solely by contamination by soil bacteria or sequencing errors but additionally by PCR  
680 or capture artefacts.

681

### 682 Phylogenetic Analyses

683 For the phylogenetic analyses we aimed for one high coverage genome per site to minimize  
684 missing data in the SNP alignment, excluding the genome of UNT004.A after assuring no  
685 conflicting positions with UNT003.A in the SNP evaluation. A maximum likelihood tree  
686 (RAxML 8 (28) using the GTR substitution model, Fig. 2A, for full tree see Fig. S2) was  
687 generated without exclusion of missing and ambiguous data (full SNP alignment), resulting in  
688 a total number of 6496 SNPs. Robustness of all trees was tested by the bootstrap methods using  
689 1000 pseudo-replicates.

690 A detailed tree of the First Pandemic lineage was drawn manually based on the performed SNP  
691 evaluation, excluding all false positive SNPs (Fig. 2B).

692

### 693 Analysis of virulence factors and genome decay

694 The presence/absence analysis for genes was performed with BEDTools (65) by calculating the  
695 percentage across each gene (3). Since gene duplications can affect the mapping quality, the  
696 mapping quality filter of BWA was set to 0 ( $-q = 0$ ) to generate a bam-file as input. For the  
697 heatmap of virulence factors (Fig. 3), a collection of proven and putative virulence genes (29,

698 30) was evaluated. The more extensive analysis on genome decay was based on the annotation  
699 file for the reference genome CO92 (54) by extracting all regions annotated as ‘gene’.  
700 For the exact determination of the start and end positions of deletions, mapping with  
701 BWA\_MEM was performed (66).

702

### 703 Radiocarbon Dating

704 At least one individual per burial was sampled for radiocarbon dating for all burials that tested  
705 positive for *Y. pestis*, assuming simultaneity of interment for the multiple burials. Samples were  
706 dated at the CEZ Archaeometry gGmbH, Mannheim, Germany. The raw radiocarbon dates  
707 were calibrated with IntCal13 (67) in OxCal v4.3.2 (68). All raw and calibrated dates are given  
708 in Table S9; Fig. S5 shows the respective probability distributions. Some of the intervals  
709 completely pre-date the onset of Justinianic Plague (541) which could be explained by a marine  
710 or freshwater reservoir effect (69, 70) or human bone collagen offset (71). In the absence of  
711 C/N isotope data and a well-established method for addressing the human bone collagen offset,  
712 we report calibrated dates without any correction.

713

### 714 Cartography

715 All maps were generated in ArcGIS 10.4.1 (ESRI) using the ‘World Ocean Basemap’ without  
716 references. The sources for all historical occurrences are given in the SI. The mapped regions  
717 in Fig. 1 are primarily based on the Digital Atlas of Roman and Medieval Civilizations  
718 (DARMC; <https://darmc.harvard.edu>) maps “Provinces AD303-324” for the western Europe  
719 and “Provinces ca. AD500” for eastern Europe, Middle East and Africa. The provinces in Fig.  
720 S6 are based on a georeferenced map by Rettner and Steidl (72), the Roman roads are combined  
721 from Rettner and Steidl and the DARMC map “Roman Roads”. The main rivers in Figs. 1C  
722 and 3 were taken from Natural Earth (ne\_10m\_river\_lake\_centerlines,  
723 <http://www.naturalearthdata.com>), based on data provided by the European Commission, Joint  
724 Research Centre, Institute for Environment and Sustainability (JRC IES).

725

### 726 **Acknowledgements**

727 We are grateful to Aditya K. Lankapalli, Aida Andrades Valtueña and all members of the  
728 Department of Archaeogenetics Max Planck Institute for the Science of Human History for  
729 support and fruitful discussions, and Raphaela Stahl, Marta Burri, Cécilia Freund, Franziska  
730 Aron, Antje Wissgott and Guido Brandt for their assistance in the lab. We thank the staff of the  
731 SAPM for support during sample collection and Ronny Friedrich at the CEZ Archaeometry

732 gGmbH, Mannheim for providing additional information on radiocarbon dates. Furthermore  
733 we thank Henry Gruber for his correspondence. This study was supported by the European  
734 Research Council starting grant APGREID (to J.K.) and by the Justinianic Pandemic Working  
735 Group at MHAAM/SoHP.

736

737 **Data availability**

738 The raw sequencing data of the relevant plague positive samples will be available on the  
739 European Nucleotide Archive under project accession number PRJEB29991 upon publication.

740 **References**

- 741 1. Yang R, Anisimov A (2016) *Yersinia pestis: Retrospective and Perspective* (Springer,  
742 Dordrecht).
- 743 2. Burki T (2017) Plague in Madagascar. *Lancet Infect Dis* 17(12):1241.
- 744 3. Andrades Valtueña A, et al. (2017) The Stone Age Plague and Its Persistence in  
745 Eurasia. *Curr Biol* 27:1–9.
- 746 4. Rasmussen S, et al. (2015) Early Divergent Strains of *Yersinia pestis* in Eurasia 5,000  
747 Years Ago. *Cell* 163:571–582.
- 748 5. Spyrou MA, et al. (2018) Analysis of 3800-year-old *Yersinia pestis* genomes suggests  
749 Bronze Age origin for bubonic plague. *Nat Commun* 9(2234):1–10.
- 750 6. Feldman M, et al. (2016) A High-Coverage *Yersinia pestis* Genome from a Sixth-  
751 Century Justinianic Plague Victim. *Mol Biol Evol* 33(11):2911–2923.
- 752 7. Wagner DM, et al. (2014) *Yersinia pestis* and the Plague of Justinian 541-543 AD: A  
753 genomic analysis. *Lancet Infect Dis* 14(4):319–326.
- 754 8. Benedictow OJ (2004) *The Black Death, 1346-1353 : The Complete History* (Boydell  
755 & Brewer, Woodsbridge).
- 756 9. Bos KI, et al. (2011) A draft genome of *Yersinia pestis* from victims of the Black  
757 Death. *Nature* 478(7370):506–10.
- 758 10. Biraben J-N (1975) *Les hommes et la peste en France et dans les pays européens et*  
759 *méditerranéens* (Mouton, Paris).
- 760 11. Spyrou MA, et al. (2016) Historical *Y. pestis* Genomes Reveal the European Black  
761 Death as the Source of Ancient and Modern Plague Pandemics. *Cell Host Microbe*  
762 19(6):874–881.
- 763 12. Bos KI, et al. (2016) Eighteenth century *Yersinia pestis* genomes reveal the long-term  
764 persistence of an historical plague focus. *Elife* 5:e12994.
- 765 13. Wiechmann I, Grupe G (2005) Detection of *Yersinia pestis* DNA in two early medieval  
766 skeletal finds from Aschheim (Upper Bavaria, 6th century A.D.). *Am J Phys Anthropol*  
767 126(1):48–55.
- 768 14. Drancourt M, et al. (2004) Genotyping, orientalis-like *Yersinia pestis*, and plague  
769 pandemics. *Emerg Infect Dis* 10(9):1585–1592.
- 770 15. Drancourt M, et al. (2007) *Yersinia pestis* Orientalis in remains of ancient plague  
771 patients. *Emerg Infect Dis* 13(2):332–333.
- 772 16. Gilbert MTP, et al. (2004) Absence of *Yersinia pestis*-specific DNA in human teeth  
773 from five European excavations of putative plague victims. *Microbiology* 150:341–



- 774 354.
- 775 17. Harbeck M, et al. (2013) *Yersinia pestis* DNA from Skeletal Remains from the 6th  
776 Century AD Reveals Insights into Justinianic Plague. *PLoS Pathog* 9(5):e1003349.
- 777 18. Schuenemann VJ, et al. (2011) Targeted enrichment of ancient pathogens yielding the  
778 pPCP1 plasmid of *Yersinia pestis* from victims of the Black Death. *Proc Natl Acad Sci*  
779 *USA* 108(38):746–752.
- 780 19. Vågane ÅJ, et al. (2018) *Salmonella enterica* genomes from victims of a major  
781 sixteenth-century epidemic in Mexico. *Nat Ecol Evol* 2(3):520–528.
- 782 20. Huson DH, et al. (2016) MEGAN Community Edition - Interactive Exploration and  
783 Analysis of Large-Scale Microbiome Sequencing Data. *PLoS Comput Biol*  
784 12(6):e1004957.
- 785 21. Briggs AW, et al. (2007) Patterns of damage in genomic DNA sequences from a  
786 Neandertal. *Proc Natl Acad Sci U S A* 104(37):14616–14621.
- 787 22. Warinner C, et al. (2017) A Robust Framework for Microbial Archaeology. *Annu Rev*  
788 *Genomics Hum Genet* 18(1):13.1-13.36.
- 789 23. Briggs AW, et al. (2010) Removal of deaminated cytosines and detection of in vivo  
790 methylation in ancient DNA. *Nucleic Acids Res* 38(6):e87–e87.
- 791 24. Morelli G, et al. (2010) *Yersinia pestis* genome sequencing identifies patterns of global  
792 phylogenetic diversity. *Nat Genet* 42(12):1140–1143.
- 793 25. Kay GL, et al. (2015) Eighteenth-century genomes show that mixed infections were  
794 common at time of peak tuberculosis in Europe. *Nat Commun* 6(6717):6717.
- 795 26. Damgaard P de B, et al. (2018) 137 ancient human genomes from across the Eurasian  
796 steppes. *Nature*.
- 797 27. Chain PSG, et al. (2004) Insights into the evolution of *Yersinia pestis* through whole-  
798 genome comparison with *Yersinia pseudotuberculosis*. *Proc Natl Acad Sci*  
799 101(38):13826–13831.
- 800 28. Stamatakis A (2014) RAxML version 8: a tool for phylogenetic analysis and post-  
801 analysis of large phylogenies. *Bioinformatics* 30(9):1312–1313.
- 802 29. Zhou D, Yang R (2009) Molecular Darwinian Evolution of Virulence in *Yersinia*  
803 *pestis*. *Infect an* 77(6):2242–2250.
- 804 30. Zhou D, et al. (2004) Genetics of Metabolic Variations between *Yersinia pestis* Biovars  
805 and the Proposal of a New Biovar, *microtus*. *J Bacteriol* 186(15):5147–5152.
- 806 31. Derbise A, Carniel E (2014) YpfΦ: a filamentous phage acquired by *Yersinia pestis*.  
807 *Front Microbiol* 5(December):701.

- 808 32. Ford DC, Joshua GWP, Wren BW, Oyston PCF (2014) The importance of the  
809 magnesium transporter MgtB for virulence of *Yersinia pseudotuberculosis* and  
810 *Yersinia pestis*. *Microbiology* 160:2710–2717.
- 811 33. Chain PSG, et al. (2006) Complete genome sequence of *Yersinia pestis* strains antiqua  
812 and Nepal516: Evidence of gene reduction in an emerging pathogen. *J Bacteriol*  
813 188(12):4453–4463.
- 814 34. Fetherston JD, Perry RD (1994) The pigmentation locus of *Yersinia pestis* KIM6+ is  
815 flanked by an insertion sequence and includes the structural genes for pesticin  
816 sensitivity and HMWP2. *Mol Microbiol* 13(4):697–708.
- 817 35. Spyrou MA, et al. (2018) A phylogeography of the second plague pandemic revealed  
818 through the analysis of historical *Y. pestis* genomes. *bioRxiv*.
- 819 36. Häscher S, et al. (2015) The *pla* gene, encoding plasminogen activator, is not specific to  
820 *Yersinia pestis*. *BMC Res Notes* 8(535):1–3.
- 821 37. Garcia E, et al. (2007) Pestoides F, an atypical *Yersinia pestis* strain from the former  
822 Soviet Union. *Adv Exp Med Biol* 603:17–22.
- 823 38. Cui Y, et al. (2013) Historical variations in mutation rate in an epidemic pathogen,  
824 *Yersinia pestis*. *Proc Natl Acad Sci USA* 110(2):577–82.
- 825 39. Harper K (2017) *The Fate of Rome: Climate, Disease, and the End of an Empire*  
826 (Princeton University Press, Princeton).
- 827 40. McCormick M (2003) Rats, Communications, and Plague: Toward an Ecological  
828 History. *J Interdiscip Hist* 34(1):1–25.
- 829 41. Audoin-Rouzeau F, Vigne J-D (1997) Le rat noir (*Rattus rattus*) en Europe antique et  
830 médiévale: Les voies du commerce et l'expansion de la peste. *Anthropozoologica*  
831 25(26):399–404.
- 832 42. Seifert L, et al. (2016) Genotyping *Yersinia pestis* in Historical Plague: Evidence for  
833 Long-Term Persistence of *Y. pestis* in Europe from the 14th to the 17th Century. *PLoS*  
834 *One* 11(1):e0145194.
- 835 43. Schmid B V, et al. (2015) Climate-driven introduction of the Black Death and  
836 successive plague reintroductions into Europe. *Proc Natl Acad Sci USA* 112(10):3020–  
837 5.
- 838 44. Eroshenko GA, et al. (2017) *Yersinia pestis* strains of ancient phylogenetic branch  
839 0.ANT are widely spread in the high- mountain plague foci of Kyrgyzstan. *PLoS One*  
840 12(10):e0187230.
- 841 45. Eppinger M, et al. (2010) Genome sequence of the deep-rooted *Yersinia pestis* strain

- 842 angola reveals new insights into the evolution and pangenome of the plague bacterium.  
843 *J Bacteriol* 192(6):1685–1699.
- 844 46. Green MH (2014) Taking “Pandemic” Seriously: Making the Black Death Global.  
845 *Pandemic Disease in the Medieval World: Rethinking the Black Death*, ed Green MH  
846 (Kalamazoo, Bradford).
- 847 47. Sarris P (2002) The Justinianic plague: origins and effects. *Contin Chang* 17(2):169–  
848 182.
- 849 48. Allen P (1979) The “Justinianic” Plague. *Byzantion* 49:5–20.
- 850 49. Schamiloglu U (2016) The Plague in the Time of Justinian and Central Eurasian  
851 History: An agenda for Research. *Central Eurasia in the Middle Ages. Studies in*  
852 *Honour of Peter B. Golden*, eds Zimonyi I, Karatay O (Harrasowitz Verlag,  
853 Wiesbaden).
- 854 50. Little LK, et al. (2007) *Plague and the End of Antiquity: The Pandemic of 541-750* ed  
855 Little LK (Cambridge University Press).
- 856 51. Gruber H (2018) Indirect Evidence for the Social Impact of the Justinianic Pandemic:  
857 Episcopal Burial and Conciliar Legislation in Visigothic Hispania. *J Late Antiq*  
858 11(1):193–215.
- 859 52. Kulikowski M (2007) Plague in Spanish Late Antiquity. *Plague and the End of*  
860 *Antiquity: The Pandemic of 541-750*, ed Little LK (Cambridge University Press,  
861 Cambridge), pp 150–170.
- 862 53. McNally A, Thomson NR, Reuter S, Wren BW (2016) “Add, stir and reduce”: *Yersinia*  
863 spp. as model bacteria for pathogen evolution. *Nat Rev Microbiol* 14(3):177–190.
- 864 54. Parkhill J, et al. (2001) Genome sequence of *Yersinia pestis*, the causative agent of  
865 plague. *Nature* 413(6855):523–527.
- 866 55. Alapont Martín L, Ribera i Lacomba AV (2009) Topografía y jerarquía funeraria en la  
867 Valencia tardo-antigua. *Morir en el Mediterráneo Medieval: Actas del III Congreso*  
868 *Internacional de Arqueología, Arte e Historia de la Antigüedad Tardía y Alta Edad*  
869 *Media Peninsular* (Oxford), pp 59–88.
- 870 56. Stoclet AJ (2007) Consilia humana, ops divina, superstitio: Seeking Succor and Solace  
871 in Times of Plague, with Particular Reference to Gaul in the Early Middle Ages.  
872 *Plague and the End of Antiquity: The Pandemic of 541-750*, ed Little LK (Cambridge  
873 University Press, Cambridge), pp 135–149.
- 874 57. Raynaud C (2010) *Les nécropoles de Lunel-Viel (Hérault) de l’Antiquité au Moyen*  
875 *Âge. Revue archéologique de Narbonnaise Supplément 40* (Presses universitaires de la

- 876 Méditerranée, Montpellier).
- 877 58. Dabney J, et al. (2013) Complete mitochondrial genome sequence of a Middle  
878 Pleistocene cave bear reconstructed from ultrashort DNA fragments. *Proc Natl Acad*  
879 *Sci USA* 110(39):15758–15763.
- 880 59. Meyer M, Kircher M (2010) Illumina sequencing library preparation for highly  
881 multiplexed target capture and sequencing. *Cold Spring Harb Protoc* 2010(6).
- 882 60. Kircher M, Sawyer S, Meyer M (2012) Double indexing overcomes inaccuracies in  
883 multiplex sequencing on the Illumina platform. *Nuc* 40(1):1–8.
- 884 61. Rasmussen M, et al. (2014) The genome of a Late Pleistocene human from a Clovis  
885 burial site in western Montana. *Nature* 506:225–229.
- 886 62. Fu Q, et al. (2013) DNA analysis of an early modern human from Tianyuan Cave,  
887 China. *Proc Natl Acad Sci USA* 110(6):2223–2227.
- 888 63. Peltzer A, et al. (2016) EAGER: efficient ancient genome reconstruction. *Genome Biol*  
889 17:60.
- 890 64. Bos KI, et al. (2014) Pre-Columbian mycobacterial genomes reveal seals as a source of  
891 New World human tuberculosis. *Nature* 514(7523):494–497.
- 892 65. Quinlan AR, Hall IM (2010) BEDTools: a flexible suite of utilities for comparing  
893 genomic features. *Bioinformatics* 26(6):841–842.
- 894 66. Li H (2013) Aligning sequence reads, clone sequences and assembly contigs with  
895 BWA-MEM. *arXiv*:1303.3997.
- 896 67. Reimer PJ, et al. (2013) IntCal13 and Marine13 Radiocarbon Age Calibration Curves  
897 0–50,000 Years cal BP. *Radiocarbon* 55(4):1869–1887.
- 898 68. Ramsey CB (2017) Methods for Summarizing Radiocarbon Datasets. *Radiocarbon*  
899 59(6):1809–1833.
- 900 69. Ascough PL, et al. (2010) Temporal and spatial variations in freshwater <sup>14</sup>C reservoir  
901 effects: Lake Mývatn, northern Iceland. *Radiocarbon* 52(2–3):1098–1112.
- 902 70. Ascough P, Cook G, Dugmore A (2005) Methodological approaches to determining the  
903 marine radiocarbon reservoir effect. *Prog Phys Geogr* 4:532–547.
- 904 71. Barta P, Štolc S (2007) HBCO Correction: Its Impact on Archaeological Absolute  
905 Dating. *Radiocarbon* 49(2 "Proceedings of the 19th international Radiocarbon  
906 Conference, Keble College, Oxford, England"):465–472.
- 907 72. Wamser L (2010) *Karfunkelstein und Seide. Neue Schätze aus Bayerns Frühzeit*  
908 (Pustet, Regensburg).
- 909

910 **Fig. 1:** Geographic extent of the First Pandemic and sampled sites. A: Map of historically documented occurrences of plague (regions shaded, cities  
 911 depicted by circles, both with respective years of occurrence) between 541 and 650 in Europe and the Mediterranean basin. All sources are given in  
 912 the SI. Sites with genomic evidence for *Y. pestis* are shown as pink (previously published) and yellow squares (presented here). B: Enlarged  
 913 rectangular space of A (right) showing all sites in Germany and Austria that were included in this study. Sites tested negative are depicted in black  
 914 upward-pointing triangles (burials dating before 541), squares (dating around 541–544) downward-pointing triangles (dating after 544). C: Enlarged  
 915 inset of A (left) shows reported occurrences in France and main rivers.

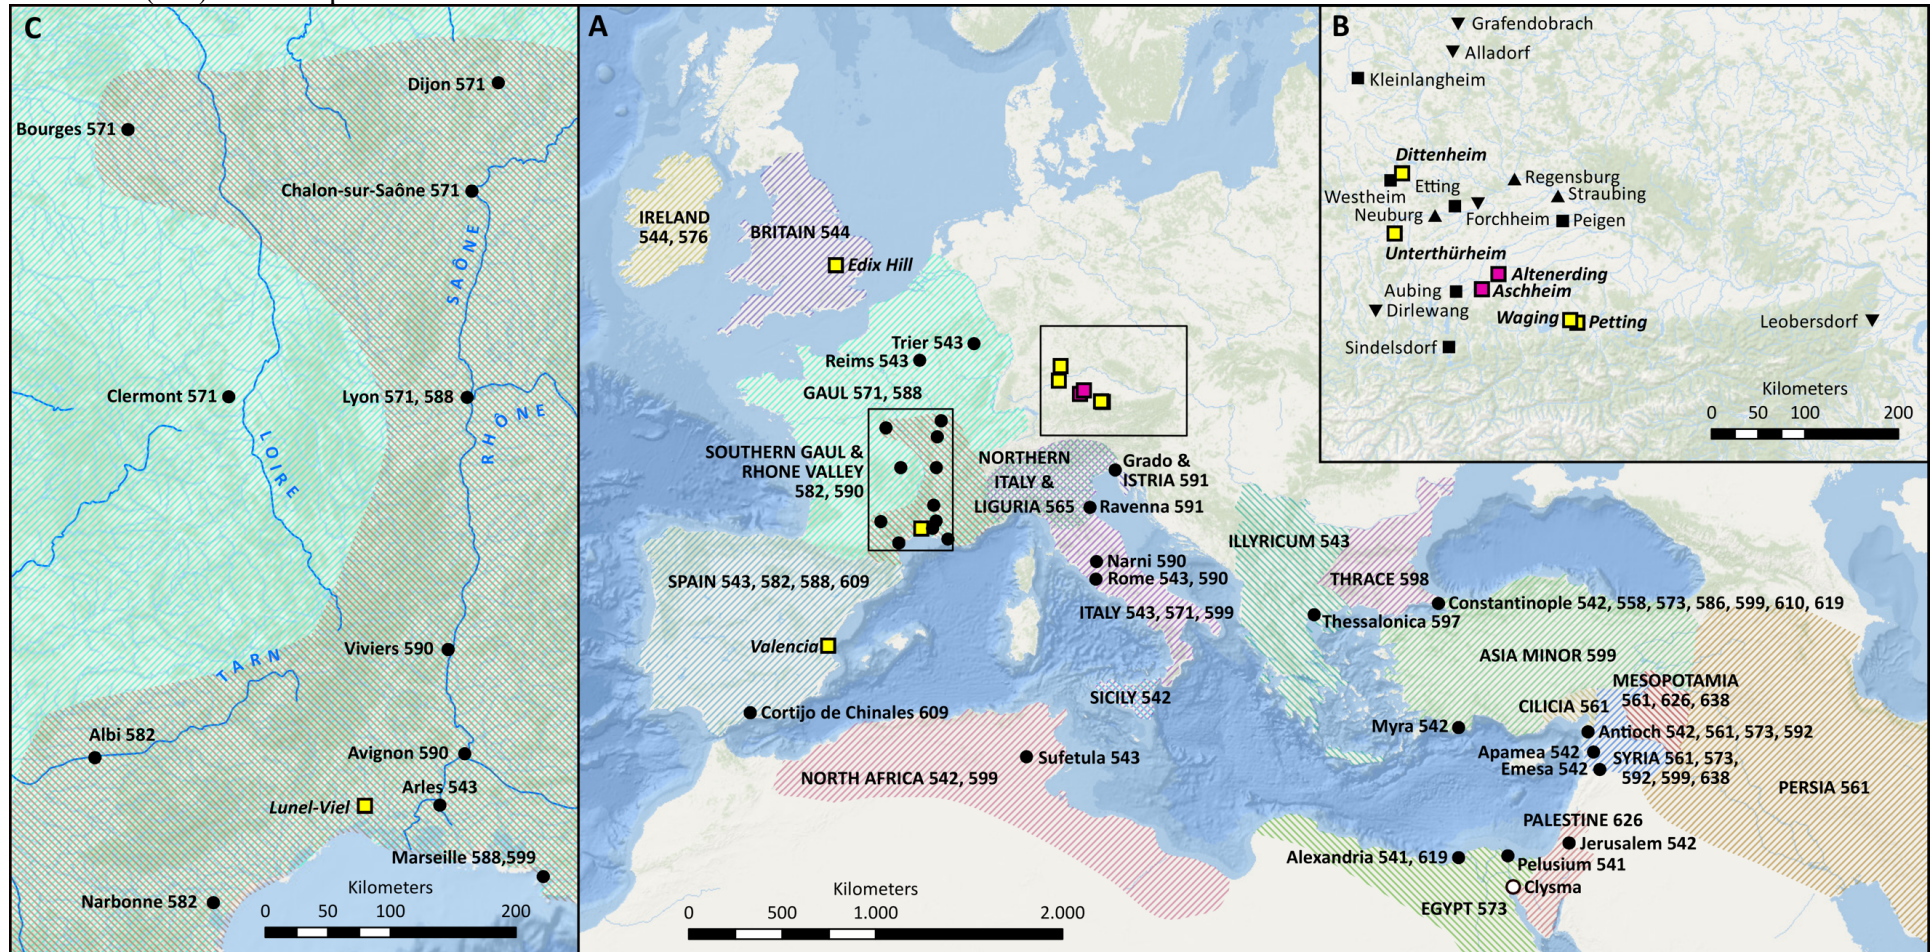

916

917 **Fig. 2:** Phylogenetic tree. A: Maximum Likelihood tree with full SNP alignment (6496 positions) of 233 modern *Y. pestis* and one *Y.*  
 918 *pseudotuberculosis* genome, nine published (2<sup>nd</sup> to 3<sup>rd</sup> century Tian Shan in orange; Altenerding in blue; Second Pandemic in red) and six genomes  
 919 presented here (green) with country given in brackets (DEU=Germany, ESP=Spain, FRA=France, GBR=Great Britain). Numbers and origins of  
 920 modern genomes are given in brackets (CHN=China, COG=Congo, FSU=Former Soviet Union, IND=India, IRN=Iran, MDG=Madagascar,  
 921 MMR=Myanmar, MNG=Mongolia, NPL=Nepal, UGA=Uganda). Numbers on nodes are showing bootstrap values (1000 iterations). B: Detailed,  
 922 manually drawn tree of the First Pandemic genomes showing all remaining SNP positions after SNP evaluation (number of SNPs given in italics).  
 923 C: Detailed tree of the 1.ORI clade within Branch 1, showing the polytomy.

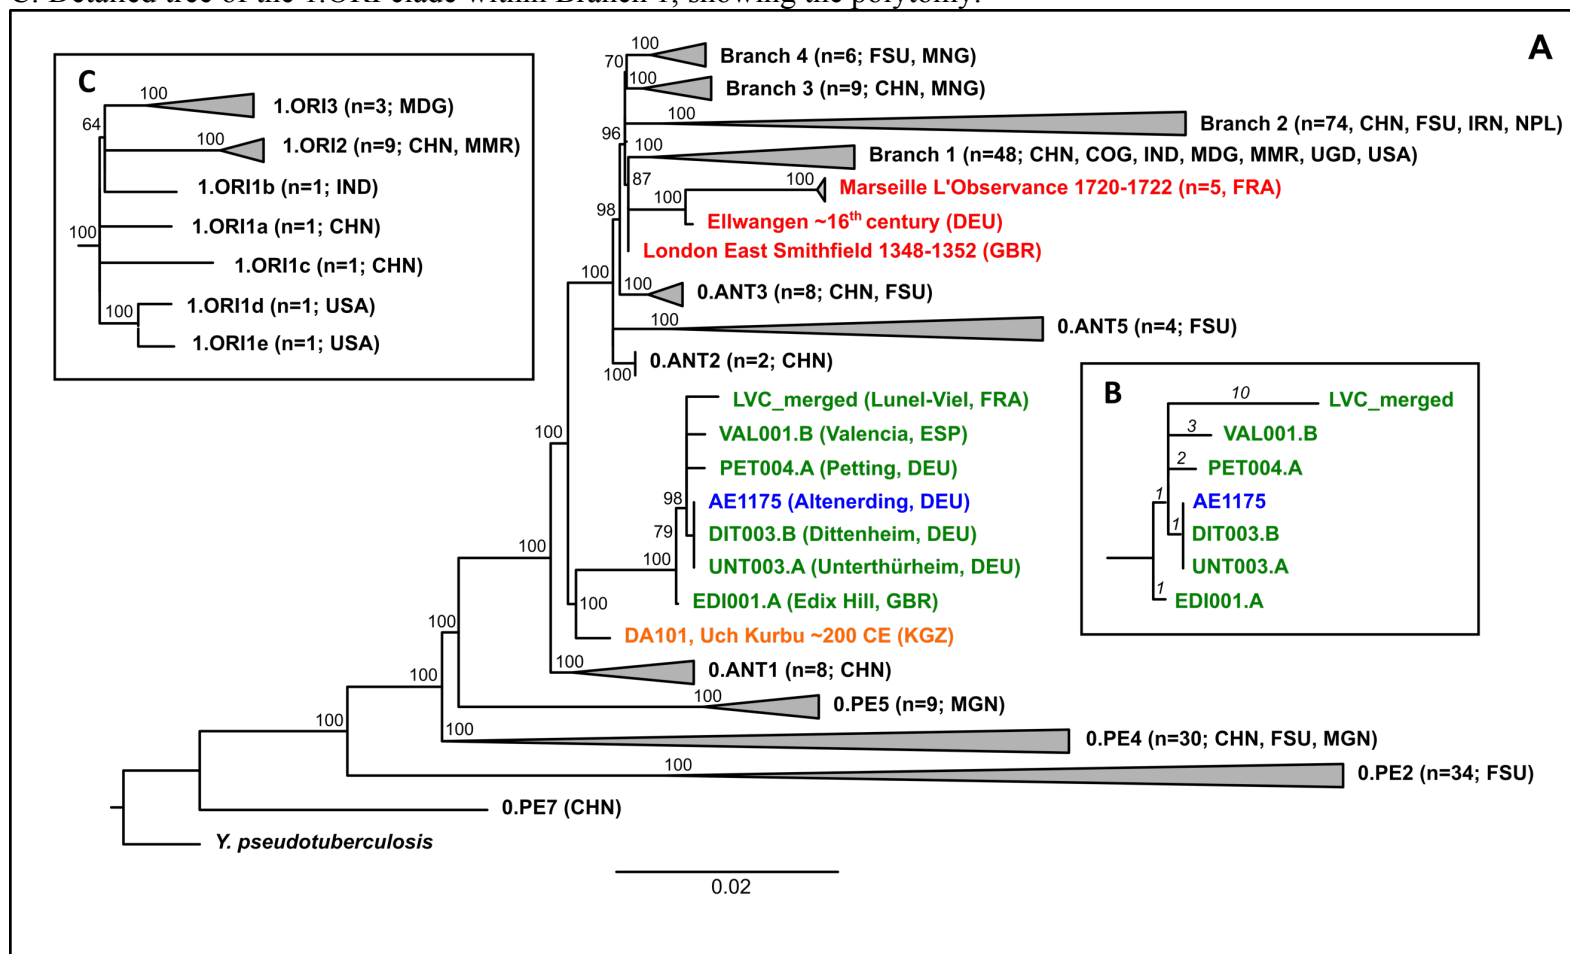

924

925 **Fig. 3:** Heatmap showing the percentage of coverage of chromosomal virulence factors. First Pandemic genomes (blue and green) and Second  
 926 Pandemic genomes (red) are shown in combination with selected strains of main clades of modern *Y. pestis* diversity on Branch 0 as well as the  
 927 reference genomes of *Y. pseudotuberculosis* and *Y. pestis* (CO92).

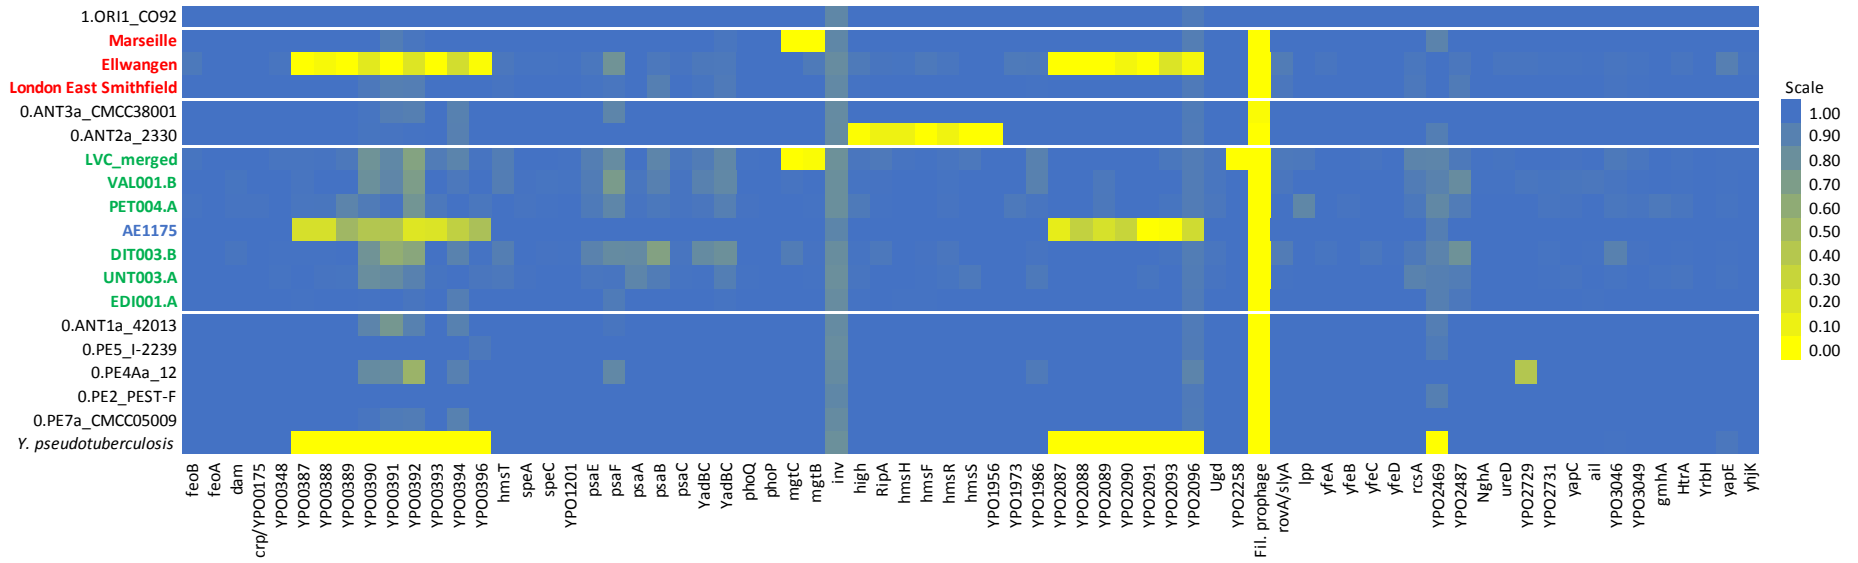

928

929 **Table 1:** List of all sites that were tested with country in brackets (AUS=Austria, DEU=Germany, ESP=Spain, FRA=France). The number of graves  
 930 is counting multiple burials as single graves; cremations are counted separately. Multiple burials are listed as number of graves times number of  
 931 individuals (5x2 translates to 5 double burials, 1x2+1 to one double burial associated with a single burial). Detailed site descriptions are given in the  
 932 SI, a table of all screened samples in Table S1.  
 933

| Site                               | Lab ID | Context                                     | Graves in total | Multiple burials              | Timeframe | Positive/total samples |
|------------------------------------|--------|---------------------------------------------|-----------------|-------------------------------|-----------|------------------------|
| Alladorf (DEU)                     | ALL    | Separate burial area ( <i>Hofgrablege</i> ) | 163             | 5x2                           | 630-720   | 0/6                    |
| Dirlawang (DEU)                    | DIR    | Early medieval cemetery                     | 40              | 2x2                           | 650-700   | 0/2                    |
| Dittenheim (DEU)                   | DIT    | Early medieval cemetery                     | 238, 10 crem.   | 4x2                           | 550-700   | 3/9                    |
| Edix Hill                          | EDI    | Early medieval cemetery                     | 115             | 1x4, 9x2                      | 500-650   | 1/22                   |
| Forchheim (DEU)                    | FOR    | Special burial                              | 1               | 1x4                           | 650-700   | 0/3                    |
| Grafendobrach (DEU)                | GRA    | Settlement burials ( <i>Hofgrablege</i> )   | 85              | 1x3, 1x2+1                    | 850-930   | 0/3                    |
| Kleinlangheim (DEU)                | KLH    | Early medieval cemetery                     | 244, 56 crem.   | 8x2, 1x3                      | 470-720   | 0/5                    |
| Leobersdorf (AUS)                  | LEO    | Early medieval cemetery                     | 154             | 16x2, 4x3, 2x4, 1x5           | 640-800   | 0/3                    |
| Lunel-Viel Horts (FRA)             | LVH    | Early medieval cemetery                     | 140             | 1x2                           | 475-700   | 0/5                    |
| Lunel-Viel Quartier centrale (FRA) | LVC    | Demolition trench inhumations               | -               | 6+2 individuals in 2 trenches | 400-600   | 6/16                   |
| München-Aubing (DEU)               | AUB    | Early medieval cemetery                     | 896             | 4x2                           | 400-700   | 0/8                    |
| Neuburg an der Donau (DEU)         | NEU    | Late Roman cemetery                         | 130             | 3x2, 1x3                      | 300-400   | 0/2                    |
| Peigen (DEU)                       | PEI    | Early medieval cemetery                     | 274             | 3x2                           | 450-700   | 0/5                    |
| Petting (DEU)                      | PET    | Early medieval cemetery                     | 721             | min. 1x3, 2x2, 1x2+1          | 530-730   | 3/7                    |
| Regensburg Fritz-Fend-Str. (DEU)   | RFF    | Late Roman cemetery                         | 115, 48 crem.   | 2x2                           | 350-450   | 0/3                    |
| Sindelsdorf (DEU)                  | SIN    | Early medieval cemetery                     | 331             | 3x2, 1x3+1                    | 500-720   | 0/5                    |
| Straubing Azlburg I/II (DEU)       | SAZ    | Late Roman cemetery                         | 541, 1 crem.    | 2x2, 1x3                      | 300-450   | 0/3                    |
| Unterthürheim (DEU)                | UNT    | Early medieval cemetery                     | 256             | 14x2, 2x3, 1x4                | 525-680   | 5/7                    |
| Valencia, Plaça de Almoina (ESP)   | VAL    | Visigothic intramural cemetery              | 67              | 3x2, 3x3, 4x4, 2x5, 15x5+     | 500-700   | 1/36                   |
| Waging (DEU)                       | WAG    | Early medieval cemetery                     | 239             | min. 2x2, 1x2+1               | 530-700   | 1/12                   |
| Westheim (DEU)                     | WES    | Early medieval cemetery                     | 228             | 5x2, 1x3                      | 500-650   | 0/3                    |

934
